# Supplementary material
Source: publisher site journal article supplement (https://www.dovepress.com/article/360292)
Supplement: Supplementary file 1 [file get_supplementary_file.php]

**Supplemental Figure 1**: Horsens Fertility Cohort (2012-2018) nested in CROSS-TRACKS. Data sources listed are the register data used for Horsens Fertility Cohort


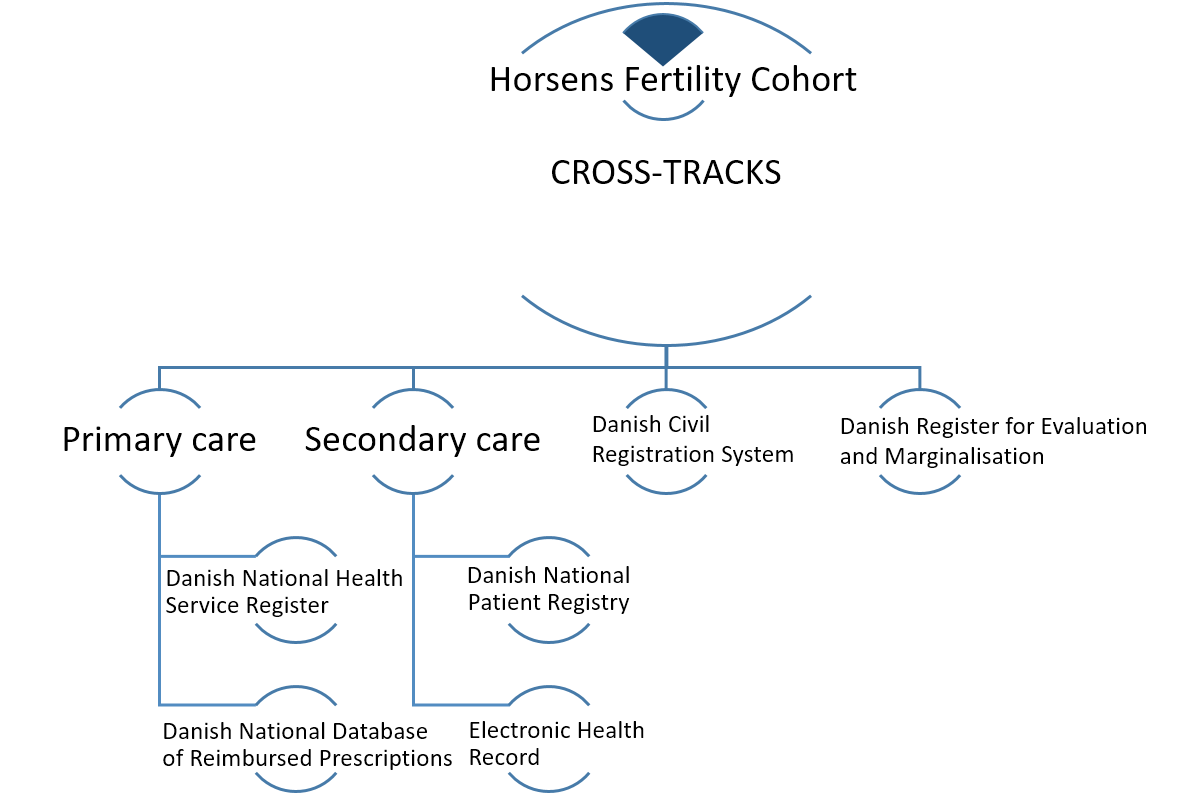


**Supplemental Table 1** Use of primary and secondary healthcare for cases and controls in the 5 years prior to the index date

|  |  |  | Overall 5 years prior index date | | | |
| --- | --- | --- | --- | --- | --- | --- |
|  |  |  | Cases (n(%)) | Controls (n(%)) | OR  (95% CI) | aOR  (95% CI) |
| **Face to face GP consultations** |  |  | Mean yearly no of contacts n = 15,605b | | | |
| Never |  |  | <5 (0.7) | 108 (3.0) | Ref | Ref |
| Any |  |  | >705 (99.3) | 3,447 (97.0) | 22.07 (3.08, 158.27) | 20.65 (2.82, 150.94) |
| T1: 0 - 1a |  |  | 135 (19.0) | 947 (26.6) | Ref | Ref |
| T2: 2 - 3a |  |  | 257 (36.2) | 1,344 (37.8) | 1.34 (1.07, 1.68) | 1.27 (1.01, 1.61) |
| T3: ≥ 4a |  |  | 319 (44.9) | 1,264 (35.6) | 1.77 (1.42, 2.19) | 1.62 (1.28, 2.04) |
| **All GP contactsc** |  |  | Mean yearly no of contacts n = 42,059b | | | |
| Never |  |  | <5 (0.7) | 92 (2.6) | Ref | Ref |
| Any |  |  | >705 (99.3) | 3,463 (97.4) | 18.86 (2.62, 135.6) | 17.29 (2.36, 126.69) |
| T1: 0 – 4d |  |  | 128 (18.0) | 908 (25.5) | Ref | Ref |
| T2: 5 -11d |  |  | 321 (45.2) | 1,588 (44.7) | 1.44 (1.15, 1.79) | 1.36 (1.07, 1.72) |
| T3: ≥ 12d |  |  | 262 (36.9) | 1,059 (29.8) | 1.75 (1.39, 2.20) | 1.60 (1.24, 2.05) |
| **Prescribed drugse** |  |  | Mean yearly no of drugs n = 11,939f | | | |
| Never |  |  | 98 (13.8) | 734 (20.7) | Ref | Ref |
| Any |  |  | 613 (86.2) | 2,821 (79.4) | 1.63 (1.29, 2.04) | 1.53 (1.21, 1.93) |
| 0 |  |  | 98 (13.8) | 734 (20.7) | Ref | Ref |
| 1-3 |  |  | 457 (64.3) | 2,170 (61.0) | 1.58 (1.25, 1.99) | 1.51 (1.19, 1.91) |
| ≥4 |  |  | 156 (21.9) | 651 (18.3) | 1.80 (1.37, 2.37) | 1.61 (1.21, 2.15) |
| **Hospitalization** |  |  | Mean yearly no of contacts n =2,159b | | | |
| Never |  |  | 220 (30.9) | 1,295 (36.4) | Ref | Ref |
| Any |  |  | 491 (69.1) | 2,260 (63.6) | 1.29 (1.08, 1.53) | 1.21 (1.01, 1.45) |
| 0 |  |  | 220 (30.9) | 1,295 (36.4) | Ref | Ref |
| 1-3 |  |  | 482 (67.8) | 2,229 (62.7) | 1.28 (1.07, 1.53) | 1.21 (1.01, 1.44) |
| ≥4 |  |  | 9 (1.3) | 31 (0.9) | 1.71 (0.80, 3.65) | 1.42 (0.65, 3.09) |
| **Hospitalization type** |  |  |  |  |  |  |
| Inpatient |  |  |  |  |  |  |
| Never |  |  | 549 (77.2) | 2,957 (83.2) | Ref | Ref |
| Any |  |  | 162 (22.8) | 598 (16.8) | 1.46 (1.20, 1.78) | 1.40 (1.15, 1.71) |
| Outpatient |  |  |  |  |  |  |
| Never |  |  | 249 (35.0) | 1,470 (41.4) | Ref | Ref |
| Any |  |  | 462 (65.0) | 2,085 (58.7) | 1.31 (1.11, 1.56) | 1.24 (1.04, 1.47) |
| Emergency |  |  |  |  |  |  |
| Never |  |  | 574 (80.7) | 2,939 (82.7) | Ref | Ref |
| Any |  |  | 137 (19.3) | 616 (17.3) | 1.15 (0.93, 1.42) | 1.09 (0.89, 1.35) |

Note: OR, odds ratio; aOR, adjusted odds ratio; CI, confidence interval; Ref, reference. Adjusted for income and citizenship.

aTertiles calculated on the basis of total number of contacts for controls in the year prior to the index date.

bMean yearly no of contacts for cases and controls for the period 5 years prior to the index date

cAll GP contacts: face-to-face daytime, mail, phone, on-call doctor.

dTertiles calculated on the basis of total number of contacts for controls in the year prior to the index date.

e Number of drugs was calculated as every redeemed drug per year and allowed for redemptions of the same drug multiple times, regardless of pack size.

fMean yearly no of redeemed prescriptions for cases and controls for the period 5 years prior to the index date.
